# Supplementary material for: Uranium in Lake Sediments of Humid Zone: A Case Study in the Southeast Fennoscandia (Karelia, Russia)
Source: MDPI journal article supplement (doi:10.3390/w15071360), 2023-04-01
Supplement: s1 [file s1]

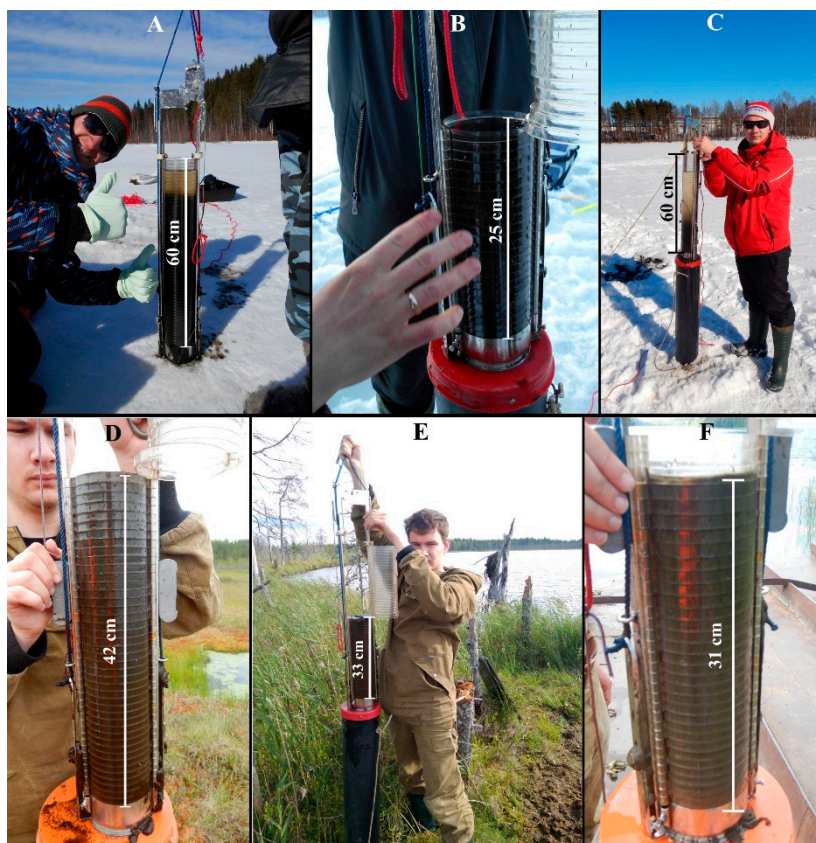

**Supplementary figure.** Photographs of sediment cores of some studied lakes (A – Lamba, B – Kitaiskoe, C – Chetyrekhverstnoe, D – Liunkunlampi, E – Gryaznoe, F – Raivattalanlampi)
