# Supplementary material for: Uranium in Lake Sediments of Humid Zone: A Case Study in the Southeast Fennoscandia (Karelia, Russia)
Source: MDPI journal article supplement (doi:10.3390/w15071360), 2023-04-01
Supplement: s1 [file s1]

Archive with 1 entries (1 files):
- water-2290855-supplementary.pdf
